# Supplementary material for: Li7(BH)5+: a new thermodynamically favored star-shaped molecule
Source: Royal Society of Chemistry journal article supplement (doi:10.1039/c5cp02006a), 2015-01-01
Supplement: c5cp02006a1.pdf [file c5cp02006a1.pdf]

## Li<sub>7</sub>(BH)<sub>5</sub><sup>+</sup>: A New Thermodynamically Favored Star-shaped Molecule

Juan J. Torres-Vega,<sup>a,b</sup> Alejandro Vásquez-Espinal,<sup>a</sup> Maria J. Beltran,<sup>a</sup> LinaRuiz,<sup>c</sup> Rafael Islas,<sup>d</sup> and William Tiznado<sup>d,\*</sup>

<sup>a</sup> Doctorado en Físicoquímica Molecular, Facultad de Ciencias Exactas, Universidad Andres Bello, República 275, Santiago, Chile.

<sup>b</sup> Departamento de Matemáticas y Física, Universidad Bernardo OHiggins, Viel 1497, Santiago, Chile

<sup>c</sup> Centro de Investigación Biomédica, Universidad Autónoma de Chile, Llano Subercaseaux 2801, Santiago (Chile).

<sup>d</sup> Departamento de Ciencias Químicas, Facultad de Ciencias Exactas, Universidad Andres Bello, República 275, Santiago, Chile.

Li<sub>6</sub>(BH)<sub>5</sub><sup>-</sup>: Structure, Cartesian coordinates and relative energies of the singlet state minima conformations

| System                                                                              | Structure    |              |              | Relative energy |                      |
|-------------------------------------------------------------------------------------|--------------|--------------|--------------|-----------------|----------------------|
| 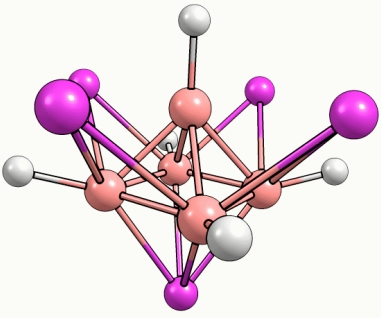  | B            | -0.91135000  | 0.801084000  | 0.474290000     | PBE0/cc-pvTZ<br>0.00 |
|                                                                                     | B            | 0.000080000  | -0.000007000 | -0.765078000    |                      |
|                                                                                     | B            | -0.801172000 | -0.911278000 | 0.474579000     | CCSD(T)<br>0.00      |
|                                                                                     | B            | 0.911312000  | -0.801087000 | 0.474639000     |                      |
|                                                                                     | B            | 0.801015000  | 0.911381000  | 0.474673000     |                      |
|                                                                                     | Li           | 0.146373000  | -2.265023000 | -0.933459000    |                      |
|                                                                                     | Li           | -0.000472000 | 0.000202000  | 2.259218000     |                      |
|                                                                                     | Li           | -2.265230000 | -0.146541000 | -0.932917000    |                      |
|                                                                                     | Li           | 2.265719000  | 0.146006000  | -0.932316000    |                      |
|                                                                                     | Li           | -0.146235000 | 2.265473000  | -0.933386000    |                      |
|                                                                                     | H            | -1.813975000 | 1.594099000  | 0.180768000     |                      |
|                                                                                     | H            | 0.000378000  | -0.000356000 | -1.972306000    |                      |
|                                                                                     | H            | 1.594353000  | 1.813773000  | 0.181243000     |                      |
|                                                                                     | H            | -1.594447000 | -1.813854000 | 0.181815000     |                      |
| H                                                                                   | 1.813800000  | -1.594481000 | 0.181545000  |                 |                      |
|  | B            | 0.317995000  | 0.137616000  | 0.295044000     | PBE0/cc-pvTZ<br>5.97 |
|                                                                                     | B            | -1.525231000 | 0.108053000  | 0.176934000     |                      |
|                                                                                     | B            | -0.625374000 | -0.559299000 | -1.150216000    | CCSD(T)<br>6.41      |
|                                                                                     | B            | -0.591759000 | -1.263459000 | 0.369003000     |                      |
|                                                                                     | B            | -0.550565000 | 1.071123000  | -0.784043000    |                      |
|                                                                                     | Li           | -0.043989000 | -0.368092000 | 2.392379000     |                      |
|                                                                                     | Li           | 0.052712000  | 2.155102000  | 1.118366000     |                      |
|                                                                                     | Li           | 1.518340000  | 0.653853000  | -1.467130000    |                      |
|                                                                                     | Li           | 1.466303000  | -1.612790000 | -0.359136000    |                      |
|                                                                                     | Li           | 2.432866000  | 0.453032000  | 1.024387000     |                      |
|                                                                                     | H            | -0.602833000 | -2.331104000 | 0.923534000     |                      |
|                                                                                     | H            | 2.777693000  | -0.459400000 | -0.805747000    |                      |
|                                                                                     | H            | -0.532946000 | 2.167797000  | -1.278979000    |                      |
|                                                                                     | H            | -0.496640000 | -1.095113000 | -2.224541000    |                      |
| H                                                                                   | -2.549291000 | 0.404332000  | 0.725523000  |                 |                      |

| System                                                                             | Structure    |              |              | Relative energy |                                               |
|------------------------------------------------------------------------------------|--------------|--------------|--------------|-----------------|-----------------------------------------------|
| 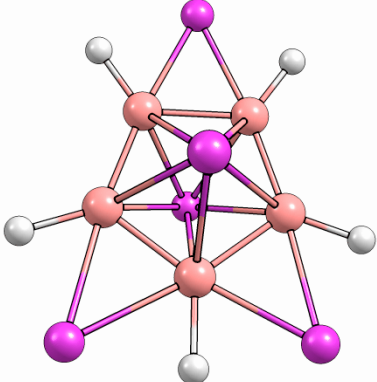  | B            | 1.277444000  | 0.863921000  | 0.010729000     | PBE0/cc-pvTZ<br>11.14<br><br>CCSD(T)<br>10.89 |
|                                                                                    | B            | 1.276518000  | -0.864629000 | 0.016662000     |                                               |
|                                                                                    | B            | -0.306406000 | 1.405182000  | -0.034210000    |                                               |
|                                                                                    | B            | -1.320063000 | 0.000266000  | -0.056722000    |                                               |
|                                                                                    | B            | -0.307893000 | -1.404900000 | -0.025782000    |                                               |
|                                                                                    | Li           | -2.254628000 | 1.809340000  | 0.102030000     |                                               |
|                                                                                    | Li           | 3.079081000  | -0.001130000 | 0.047523000     |                                               |
|                                                                                    | Li           | -2.257753000 | -1.807842000 | 0.082699000     |                                               |
|                                                                                    | Li           | 0.155150000  | -0.005976000 | -1.665002000    |                                               |
|                                                                                    | Li           | 0.047027000  | 0.005938000  | 1.634750000     |                                               |
|                                                                                    | H            | -0.694526000 | -2.598739000 | -0.044987000    |                                               |
|                                                                                    | H            | 2.295462000  | -1.607034000 | 0.058496000     |                                               |
|                                                                                    | H            | 2.297285000  | 1.605410000  | 0.046370000     |                                               |
|                                                                                    | H            | -0.693448000 | 2.598514000  | -0.067807000    |                                               |
| H                                                                                  | -2.609398000 | 0.001658000  | -0.151453000 |                 |                                               |
|  | B            | 1.078446000  | -1.315013000 | -0.168646000    | PBE0/cc-pvTZ<br>10.41<br><br>CCSD(T)<br>10.98 |
|                                                                                    | B            | 1.318948000  | 0.275600000  | -0.681589000    |                                               |
|                                                                                    | B            | -0.324868000 | 0.704238000  | -0.210182000    |                                               |
|                                                                                    | B            | 0.814958000  | 0.012833000  | 0.935755000     |                                               |
|                                                                                    | B            | -0.481138000 | -0.956697000 | 0.420457000     |                                               |
|                                                                                    | Li           | -0.241511000 | -0.721881000 | -1.824830000    |                                               |
|                                                                                    | Li           | -2.513866000 | -1.117459000 | -0.241850000    |                                               |
|                                                                                    | Li           | 1.184706000  | 2.132390000  | 0.151551000     |                                               |
|                                                                                    | Li           | -2.172496000 | 1.452622000  | -1.096321000    |                                               |
|                                                                                    | Li           | -1.275116000 | 0.555555000  | 1.752932000     |                                               |
|                                                                                    | H            | 1.769469000  | -2.298086000 | -0.095356000    |                                               |
|                                                                                    | H            | 2.242852000  | 1.013641000  | -1.023385000    |                                               |
|                                                                                    | H            | -0.803515000 | 1.800592000  | 0.187165000     |                                               |
|                                                                                    | H            | -1.329503000 | -1.430717000 | 1.189109000     |                                               |
| H                                                                                  | 1.143818000  | 0.406083000  | 2.039053000  |                 |                                               |

$\text{Li}_6(\text{BH})_5^-$  : Structure, Cartesian coordinates and relative energies of the triplet state minimum conformation

| System                                                                            | Structure   |              |              | Relative energy |                       |
|-----------------------------------------------------------------------------------|-------------|--------------|--------------|-----------------|-----------------------|
| 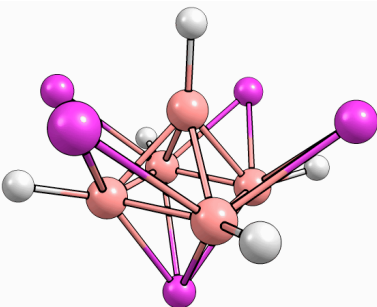 | B           | -0.000072000 | 1.229981000  | 0.439381000     | PBE0/cc-pvTZ<br>-4.60 |
|                                                                                   | B           | -0.000193000 | -0.000193000 | -0.798614000    |                       |
|                                                                                   | B           | -1.196275000 | -0.000103000 | 0.475333000     | CCSD(T)<br>1.75       |
|                                                                                   | B           | 0.000282000  | -1.229795000 | 0.440016000     |                       |
|                                                                                   | B           | 1.196528000  | 0.000274000  | 0.474665000     |                       |
|                                                                                   | Li          | -1.758114000 | -1.521542000 | -0.884386000    |                       |
|                                                                                   | Li          | 0.000626000  | 0.000583000  | 2.241443000     |                       |
|                                                                                   | Li          | -1.758663000 | 1.520792000  | -0.884620000    |                       |
|                                                                                   | Li          | 1.758079000  | -1.521402000 | -0.884768000    |                       |
|                                                                                   | Li          | 1.757750000  | 1.521453000  | -0.885484000    |                       |
|                                                                                   | H           | -0.000329000 | 2.429440000  | 0.165593000     |                       |
|                                                                                   | H           | -0.000651000 | -0.000603000 | -2.009822000    |                       |
|                                                                                   | H           | 2.399984000  | 0.000371000  | 0.207898000     |                       |
|                                                                                   | H           | -2.399862000 | -0.000316000 | 0.209136000     |                       |
| H                                                                                 | 0.000476000 | -2.429371000 | 0.166735000  |                 |                       |

$\text{Li}_6(\text{BH})_5$  : Structure, Cartesian coordinates and relative energies of the singlet state minima conformations.

| System                                                                              | Structure    |              |              | Relative energy |                      |
|-------------------------------------------------------------------------------------|--------------|--------------|--------------|-----------------|----------------------|
| 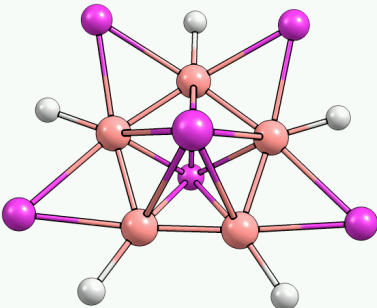 | B            | 0.000065000  | 1.269288000  | 0.123501000     | PBE0/cc-pvTZ<br>0.00 |
|                                                                                     | B            | -1.373121000 | 0.255229000  | 0.064621000     |                      |
|                                                                                     | B            | -0.830494000 | -1.349997000 | -0.038550000    | CCSD(T)<br>0.00      |
|                                                                                     | B            | 1.373120000  | 0.255004000  | 0.065161000     |                      |
|                                                                                     | B            | 0.830306000  | -1.350134000 | -0.038220000    |                      |
|                                                                                     | Li           | -1.753065000 | 2.267163000  | -0.170689000    |                      |
|                                                                                     | Li           | 0.000382000  | -0.042589000 | -1.641865000    |                      |
|                                                                                     | Li           | -2.832070000 | -1.188131000 | -0.060811000    |                      |
|                                                                                     | Li           | 1.753566000  | 2.266888000  | -0.169358000    |                      |
|                                                                                     | Li           | 2.831874000  | -1.188373000 | -0.062273000    |                      |
|                                                                                     | Li           | -0.000418000 | -0.279998000 | 1.704186000     |                      |
|                                                                                     | H            | 2.581034000  | 0.661063000  | 0.124538000     |                      |
|                                                                                     | H            | 1.536077000  | -2.372960000 | -0.130747000    |                      |
|                                                                                     | H            | 0.000105000  | 2.521288000  | 0.334202000     |                      |
| H                                                                                   | -2.581004000 | 0.661508000  | 0.123129000  |                 |                      |
| H                                                                                   | -1.536395000 | -2.372724000 | -0.131255000 |                 |                      |

| System                                                                              | Structure    |              |              | Relative energy |                       |
|-------------------------------------------------------------------------------------|--------------|--------------|--------------|-----------------|-----------------------|
| 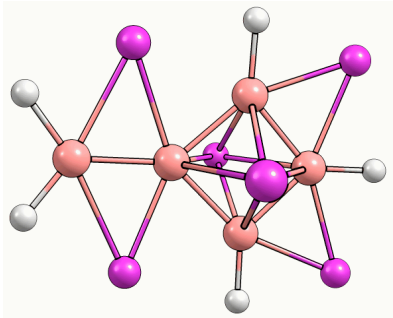   | B            | -1.614391000 | 0.000001000  | -0.000250000    | PBE0/cc-pvTZ<br>16.29 |
|                                                                                     | B            | -0.449753000 | -1.209210000 | -0.000284000    |                       |
|                                                                                     | B            | 0.827471000  | -0.000001000 | -0.000267000    | CCSD(T)<br>17.44      |
|                                                                                     | B            | -0.449752000 | 1.209213000  | -0.000204000    |                       |
|                                                                                     | B            | 2.437956000  | 0.000001000  | 0.000135000     |                       |
|                                                                                     | Li           | -2.310229000 | 1.945343000  | 0.001827000     |                       |
|                                                                                     | Li           | -2.310221000 | -1.945351000 | -0.000330000    |                       |
|                                                                                     | Li           | -0.264478000 | -0.000135000 | -1.825837000    |                       |
|                                                                                     | Li           | 1.530722000  | -1.916288000 | 0.001619000     |                       |
|                                                                                     | Li           | 1.530719000  | 1.916289000  | -0.000925000    |                       |
|                                                                                     | Li           | -0.264454000 | 0.000128000  | 1.825363000     |                       |
|                                                                                     | H            | -2.879789000 | 0.000006000  | -0.000152000    |                       |
|                                                                                     | H            | -0.469424000 | -2.461800000 | -0.000683000    |                       |
|                                                                                     | H            | -0.469419000 | 2.461805000  | -0.000590000    |                       |
| H                                                                                   | 3.162400000  | 0.997026000  | 0.000260000  |                 |                       |
| H                                                                                   | 3.162406000  | -0.997020000 | 0.000370000  |                 |                       |
|   | B            | 0.440458000  | -1.409436000 | 0.000170000     | PBE0/cc-pvTZ<br>17.05 |
|                                                                                     | B            | 1.438140000  | 0.000000000  | -0.000142000    |                       |
|                                                                                     | B            | 0.440457000  | 1.409436000  | -0.000324000    | CCSD(T)<br>17.82      |
|                                                                                     | B            | -1.131607000 | -0.869974000 | 0.000101000     |                       |
|                                                                                     | B            | -1.131607000 | 0.869973000  | -0.000048000    |                       |
|                                                                                     | Li           | 2.408033000  | -1.821853000 | -0.000248000    |                       |
|                                                                                     | Li           | 0.115232000  | -0.000373000 | -1.652436000    |                       |
|                                                                                     | Li           | 0.115478000  | 0.000373000  | 1.652340000     |                       |
|                                                                                     | Li           | 2.408032000  | 1.821854000  | 0.000587000     |                       |
|                                                                                     | Li           | -2.549360000 | 0.000290000  | -1.310961000    |                       |
|                                                                                     | Li           | -2.549151000 | -0.000290000 | 1.311236000     |                       |
|                                                                                     | H            | -2.236239000 | -1.521956000 | 0.000590000     |                       |
|                                                                                     | H            | -2.236240000 | 1.521954000  | -0.000347000    |                       |
|                                                                                     | H            | 0.816796000  | -2.594037000 | 0.000440000     |                       |
| H                                                                                   | 2.714884000  | 0.000000000  | -0.000353000 |                 |                       |
| H                                                                                   | 0.816795000  | 2.594037000  | -0.000666000 |                 |                       |
|  | B            | 1.388684000  | 0.300761000  | -0.032668000    | PBE0/cc-pvTZ<br>20.37 |
|                                                                                     | B            | 0.695606000  | -1.251789000 | 0.042703000     |                       |
|                                                                                     | B            | -0.970715000 | -1.524779000 | -0.073014000    | CCSD(T)<br>20.16      |
|                                                                                     | B            | -0.860017000 | 0.001878000  | 0.054121000     |                       |
|                                                                                     | B            | 0.073186000  | 1.337097000  | -0.045217000    |                       |
|                                                                                     | Li           | 1.870318000  | 2.293734000  | -0.061838000    |                       |
|                                                                                     | Li           | 2.702022000  | -1.279806000 | -0.091454000    |                       |
|                                                                                     | Li           | 0.200472000  | 0.029365000  | 1.851719000     |                       |
|                                                                                     | Li           | -2.041668000 | 1.844591000  | 0.113396000     |                       |
|                                                                                     | Li           | -2.980774000 | -0.549573000 | -0.036430000    |                       |
|                                                                                     | Li           | 0.188657000  | -0.229938000 | -1.796100000    |                       |
|                                                                                     | H            | 2.616666000  | 0.557167000  | 0.179319000     |                       |
|                                                                                     | H            | 1.256434000  | -2.248510000 | 0.507278000     |                       |
|                                                                                     | H            | -0.146184000 | 2.519487000  | -0.315744000    |                       |
| H                                                                                   | -3.601700000 | 1.084043000  | -0.059234000 |                 |                       |
| H                                                                                   | -1.576021000 | -2.553145000 | 0.020879000  |                 |                       |

| System                                                                            | Structure    |              |              | Relative energy |                       |
|-----------------------------------------------------------------------------------|--------------|--------------|--------------|-----------------|-----------------------|
| 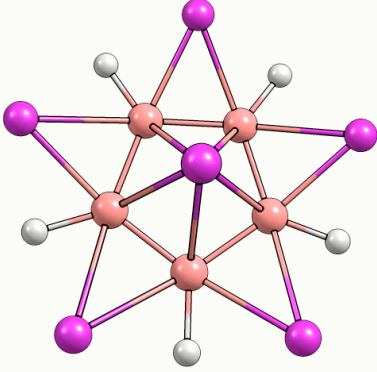 | B            | -0.264699000 | 0.440664000  | 1.356335000     | PBE0/cc-pvTZ<br>26.08 |
|                                                                                   | B            | -0.266278000 | -1.153569000 | -0.837941000    |                       |
|                                                                                   | B            | -0.266278000 | -1.153569000 | 0.837941000     | CCSD(T)<br>25.03      |
|                                                                                   | B            | -0.264699000 | 0.440664000  | -1.356335000    |                       |
|                                                                                   | B            | -0.263866000 | 1.426183000  | 0.000000000     |                       |
|                                                                                   | Li           | 0.254520000  | 2.387013000  | -1.735466000    |                       |
|                                                                                   | Li           | 0.254520000  | 2.387013000  | 1.735466000     |                       |
|                                                                                   | Li           | 0.263296000  | -0.912583000 | 2.803525000     |                       |
|                                                                                   | Li           | 1.487944000  | 0.001249000  | 0.000000000     |                       |
|                                                                                   | Li           | 0.263296000  | -0.912583000 | -2.803525000    |                       |
|                                                                                   | Li           | 0.255473000  | -2.950258000 | 0.000000000     |                       |
|                                                                                   | H            | -0.344959000 | -2.178997000 | 1.582887000     |                       |
|                                                                                   | H            | -0.340317000 | 0.831245000  | 2.562399000     |                       |
|                                                                                   | H            | -0.337494000 | 2.694088000  | 0.000000000     |                       |
|                                                                                   | H            | -0.340317000 | 0.831245000  | -2.562399000    |                       |
| H                                                                                 | -0.344959000 | -2.178997000 | -1.582887000 |                 |                       |

**Li<sub>6</sub>(BH)<sub>5</sub>** : Structure, Cartesian coordinates and relative energies of the triplet state minimum conformations

| System                                                                              | Structure   |              |              | Relative energy |                       |
|-------------------------------------------------------------------------------------|-------------|--------------|--------------|-----------------|-----------------------|
| 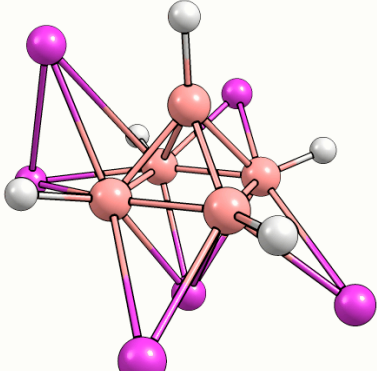 | B           | 0.836573000  | 0.448020000  | 0.712532000     | PBE0/cc-pvTZ<br>15.34 |
|                                                                                     | B           | 0.313868000  | -1.050154000 | 0.037795000     |                       |
|                                                                                     | B           | 0.435657000  | 0.361575000  | -0.982660000    | CCSD(T)<br>20.72      |
|                                                                                     | B           | -1.078177000 | -0.272431000 | -0.583393000    |                       |
|                                                                                     | B           | -0.604824000 | 1.210181000  | 0.106178000     |                       |
|                                                                                     | Li          | 2.161435000  | -1.228461000 | 1.278641000     |                       |
|                                                                                     | Li          | 2.215611000  | -0.838737000 | -1.317672000    |                       |
|                                                                                     | Li          | 1.065468000  | 2.419258000  | 0.136135000     |                       |
|                                                                                     | Li          | -1.779050000 | -2.192387000 | 0.072627000     |                       |
|                                                                                     | Li          | -0.913488000 | -0.260804000 | 1.724101000     |                       |
|                                                                                     | Li          | -2.914669000 | 0.565558000  | 0.130805000     |                       |
|                                                                                     | H           | -0.883543000 | 2.395011000  | -0.061589000    |                       |
|                                                                                     | H           | 1.917288000  | 0.894037000  | 1.098839000     |                       |
|                                                                                     | H           | 0.908548000  | -2.100828000 | -0.199350000    |                       |
|                                                                                     | H           | -1.983039000 | -0.630867000 | -1.337011000    |                       |
| H                                                                                   | 1.019335000 | 0.563415000  | -2.027059000 |                 |                       |

**Li<sub>7</sub>(BH)<sub>5</sub><sup>+</sup>: Structure, Cartesian coordinates and relative energies of the singlet state minima conformations**

| System                                                                              | Structure    |              |              | Relative energy |                       |
|-------------------------------------------------------------------------------------|--------------|--------------|--------------|-----------------|-----------------------|
| 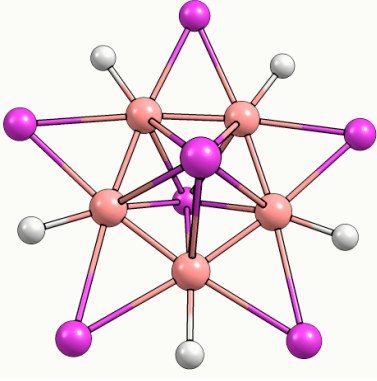   | B            | -1.244878000 | -0.707620000 | -0.058828000    | PBE0/cc-pvTZ<br>0.00  |
|                                                                                     | B            | 0.287610000  | -1.404344000 | 0.014251000     |                       |
|                                                                                     | B            | 1.422350000  | -0.160129000 | 0.067497000     | CCSD(T)<br>0.00       |
|                                                                                     | B            | -1.056983000 | 0.967092000  | -0.051555000    |                       |
|                                                                                     | B            | 0.591864000  | 1.305251000  | 0.027141000     |                       |
|                                                                                     | Li           | -3.038173000 | 0.344057000  | -0.105408000    |                       |
|                                                                                     | Li           | -0.081465000 | 0.000341000  | 1.706718000     |                       |
|                                                                                     | Li           | -1.267860000 | -2.784682000 | -0.012202000    |                       |
|                                                                                     | Li           | 2.660404000  | 1.508168000  | 0.101790000     |                       |
|                                                                                     | Li           | 0.083418000  | -0.001120000 | -1.706396000    |                       |
|                                                                                     | Li           | 2.255758000  | -2.065620000 | 0.087165000     |                       |
|                                                                                     | Li           | -0.609956000 | 2.997878000  | -0.055424000    |                       |
|                                                                                     | H            | 1.113176000  | 2.453010000  | 0.060289000     |                       |
|                                                                                     | H            | 2.673141000  | -0.301976000 | 0.137179000     |                       |
| H                                                                                   | 0.539710000  | -2.639729000 | 0.021993000  |                 |                       |
| H                                                                                   | -2.339759000 | -1.329519000 | -0.124602000 |                 |                       |
| H                                                                                   | -1.985957000 | 1.817942000  | -0.102008000 |                 |                       |
|  | B            | 1.149403000  | -1.216470000 | -0.018537000    | PBE0/cc-pvTZ<br>25.36 |
|                                                                                     | B            | 1.390929000  | 0.447629000  | 0.028250000     |                       |
|                                                                                     | B            | -0.479467000 | -1.550104000 | -0.041552000    | CCSD(T)<br>25.98      |
|                                                                                     | B            | -1.324004000 | -0.076054000 | -0.007839000    |                       |
|                                                                                     | B            | -0.153196000 | 1.196937000  | 0.035013000     |                       |
|                                                                                     | Li           | -2.504413000 | -1.832827000 | -0.071879000    |                       |
|                                                                                     | Li           | 3.130416000  | -0.744480000 | 0.012224000     |                       |
|                                                                                     | Li           | -1.784135000 | 1.529763000  | -1.408628000    |                       |
|                                                                                     | Li           | 0.184141000  | -0.345013000 | 1.687631000     |                       |
|                                                                                     | Li           | -1.806446000 | 1.459490000  | 1.463217000     |                       |
|                                                                                     | Li           | 0.214069000  | -0.253068000 | -1.691404000    |                       |
|                                                                                     | Li           | 1.436564000  | 2.538242000  | 0.086363000     |                       |
|                                                                                     | H            | -0.459521000 | 2.433283000  | 0.067574000     |                       |
|                                                                                     | H            | 2.493212000  | 1.060328000  | 0.053134000     |                       |
| H                                                                                   | 2.004359000  | -2.105843000 | -0.035376000 |                 |                       |
| H                                                                                   | -0.956695000 | -2.687438000 | -0.077086000 |                 |                       |
| H                                                                                   | -2.584015000 | 0.166126000  | -0.010906000 |                 |                       |

| System                                                                            | Structure   |              |              | Relative energy |                       |
|-----------------------------------------------------------------------------------|-------------|--------------|--------------|-----------------|-----------------------|
| 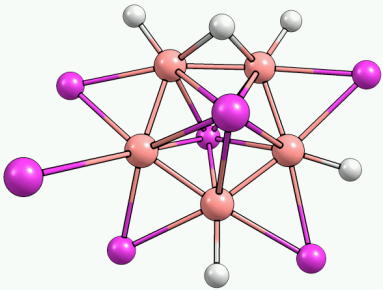 | B           | 0.046847000  | 1.257052000  | 0.007745000     | PBE0/cc-pvTZ<br>39.86 |
|                                                                                   | B           | -1.433858000 | 0.459338000  | 0.039830000     |                       |
|                                                                                   | B           | -1.158072000 | -1.214049000 | -0.063297000    | CCSD(T)<br>40.18      |
|                                                                                   | B           | 0.560719000  | -1.437308000 | -0.089522000    |                       |
|                                                                                   | B           | 1.289686000  | 0.102610000  | -0.026480000    |                       |
|                                                                                   | Li          | 1.934138000  | 1.910642000  | -0.816547000    |                       |
|                                                                                   | Li          | -0.167730000 | -0.154306000 | -1.676574000    |                       |
|                                                                                   | Li          | -1.599670000 | 2.528889000  | -0.106284000    |                       |
|                                                                                   | Li          | -0.125579000 | -0.126855000 | 1.704139000     |                       |
|                                                                                   | Li          | -3.156613000 | -0.780064000 | 0.231849000     |                       |
|                                                                                   | Li          | 2.542484000  | -1.430546000 | -0.776074000    |                       |
|                                                                                   | Li          | 2.909700000  | 0.391780000  | 1.430540000     |                       |
|                                                                                   | H           | -0.341860000 | -1.734353000 | 0.889838000     |                       |
|                                                                                   | H           | -2.584636000 | 0.983271000  | 0.062265000     |                       |
|                                                                                   | H           | -1.978387000 | -2.124641000 | -0.170808000    |                       |
|                                                                                   | H           | 0.235656000  | 2.505963000  | 0.026030000     |                       |
| H                                                                                 | 1.114375000 | -2.524422000 | -0.234249000 |                 |                       |

$\text{Li}_7(\text{BH})_5^+$  : Structure, Cartesian coordinates and relative energies of the triplet state minimum conformation.

| System                                                                              | Structure    |              |              | Relative energy |                       |
|-------------------------------------------------------------------------------------|--------------|--------------|--------------|-----------------|-----------------------|
| 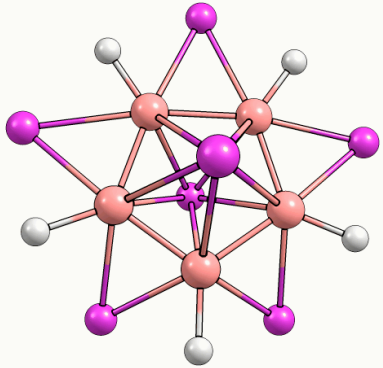 | B            | -1.349312000 | -0.508839000 | 0.289402000     | PBE0/cc-pvTZ<br>39.68 |
|                                                                                     | B            | 0.093935000  | -1.367708000 | 0.439495000     |                       |
|                                                                                     | B            | 1.404702000  | -0.316830000 | 0.299028000     | CCSD(T)<br>40.27      |
|                                                                                     | B            | -0.949108000 | 1.070596000  | 0.056794000     |                       |
|                                                                                     | B            | 0.790544000  | 1.191789000  | 0.062692000     |                       |
|                                                                                     | Li           | -0.206195000 | 2.984204000  | -0.539002000    |                       |
|                                                                                     | Li           | -0.024885000 | 0.255732000  | 1.986632000     |                       |
|                                                                                     | Li           | -2.995262000 | 0.616682000  | -0.281582000    |                       |
|                                                                                     | Li           | 2.882022000  | 1.025729000  | -0.264720000    |                       |
|                                                                                     | Li           | 1.737796000  | -2.273042000 | -0.686914000    |                       |
|                                                                                     | Li           | 0.019831000  | -0.211306000 | -1.602962000    |                       |
|                                                                                     | Li           | -1.399910000 | -2.492667000 | -0.697971000    |                       |
|                                                                                     | H            | -1.742752000 | 2.037931000  | -0.085861000    |                       |
|                                                                                     | H            | 1.443353000  | 2.259733000  | -0.076224000    |                       |
|                                                                                     | H            | 2.599556000  | -0.673573000 | 0.332628000     |                       |
|                                                                                     | H            | 0.180698000  | -2.612361000 | 0.441634000     |                       |
| H                                                                                   | -2.483113000 | -1.028271000 | 0.315431000  |                 |                       |
